# Supplementary material for: Exploring the influences of education, intelligence and income on mental disorders
Source: PubMed Central journal article supplement — Gen Psychiatr. 2024 Feb 28;37(1):e101080. doi: 10.1136/gpsych-2023-101080 (PMC10910399; doi:10.1136/gpsych-2023-101080), 2024-02-28
Supplement: gpsych-2023-101080supp001.pdf [file gpsych-2023-101080supp001.pdf]

### Supplementary File

Supplementary Table 1. Genetic correlations between educational attainment, intelligence, and income.

Supplementary Table 2. Genetic correlations between the three factors and the 13 mental disorders.

Supplementary Table 3. Causal associations between educational attainment, intelligence, and income.

Supplementary Table 4. Causal effects of the three factors on the mental disorders in the Multivariable MR analysis.

**Supplementary Table 1. Genetic correlations between educational attainment, intelligence, and income.**

| <b>Trait1</b>          | <b>Trait2</b>          | <b>r<sub>g</sub> (se)</b> | <b>Z</b> | <b>P</b> | <b>FDR</b> |
|------------------------|------------------------|---------------------------|----------|----------|------------|
| Educational attainment | Intelligence           | 0.69 (0.01)               | 49.56    | <0.001   | <0.001     |
| Income                 | Educational attainment | 0.81 (0.01)               | 74.39    | <0.001   | <0.001     |
| Income                 | Intelligence           | 0.63 (0.02)               | 34.70    | <0.001   | <0.001     |

**Supplementary Table 2. Genetic correlations between the three factors and the 13 mental disorders.**

| Trait1       | Trait2             | rg (se)      | Z      | P      | FDR    |
|--------------|--------------------|--------------|--------|--------|--------|
| EA           | ADHD               | -0.53 (0.02) | -28.18 | <0.001 | <0.001 |
| EA           | Alcohol dependence | -0.45 (0.06) | -7.87  | <0.001 | <0.001 |
| EA           | Anorexia nervosa   | 0.25 (0.03)  | 9.06   | <0.001 | <0.001 |
| EA           | Anxiety disorder   | -0.31 (0.09) | -3.44  | <0.001 | 0.002  |
| EA           | ASD                | 0.21 (0.03)  | 7.32   | <0.001 | <0.001 |
| EA           | BD                 | 0.11 (0.02)  | 6.42   | <0.001 | <0.001 |
| EA           | Insomnia           | -0.33 (0.02) | -16.60 | <0.001 | <0.001 |
| EA           | MDD                | -0.13 (0.02) | -7.22  | <0.001 | <0.001 |
| EA           | OCD                | 0.24 (0.04)  | 5.79   | <0.001 | <0.001 |
| EA           | Panic disorder     | -0.11 (0.04) | -2.61  | 0.010  | 0.017  |
| EA           | PTSD               | -0.26 (0.05) | -5.42  | <0.001 | <0.001 |
| EA           | Schizophrenia      | 0.01 (0.02)  | 0.74   | 0.461  | 0.485  |
| EA           | Tourette syndrome  | -0.14 (0.03) | -4.16  | <0.001 | <0.001 |
| Income       | ADHD               | -0.52 (0.02) | -23.13 | <0.001 | <0.001 |
| Income       | Alcohol dependence | -0.48 (0.07) | -6.98  | <0.001 | <0.001 |
| Income       | Anorexia nervosa   | 0.16 (0.03)  | 4.92   | <0.001 | <0.001 |
| Income       | Anxiety disorder   | -0.36 (0.12) | -3.08  | <0.001 | 0.005  |
| Income       | ASD                | -0.03 (0.04) | -0.84  | 0.401  | 0.446  |
| Income       | BD                 | 0.01 (0.02)  | 0.65   | 0.513  | 0.513  |
| Income       | Insomnia           | -0.35 (0.03) | -13.36 | <0.001 | <0.001 |
| Income       | MDD                | -0.27 (0.02) | -11.96 | <0.001 | <0.001 |
| Income       | OCD                | 0.14 (0.05)  | 2.70   | 0.007  | 0.014  |
| Income       | Panic disorder     | -0.08 (0.05) | -1.57  | 0.117  | 0.154  |
| Income       | PTSD               | -0.45 (0.06) | -7.90  | <0.001 | <0.001 |
| Income       | Schizophrenia      | -0.15 (0.02) | -7.30  | <0.001 | <0.001 |
| Income       | Tourette syndrome  | -0.14 (0.04) | -3.24  | 0.001  | 0.003  |
| Intelligence | ADHD               | -0.41 (0.03) | -15.00 | <0.001 | <0.001 |
| Intelligence | Alcohol dependence | -0.29 (0.06) | -4.84  | <0.001 | <0.001 |
| Intelligence | Anorexia nervosa   | 0.10 (0.04)  | 2.76   | 0.006  | 0.064  |
| Intelligence | Anxiety disorder   | -0.15 (0.09) | -1.73  | 0.083  | 0.390  |
| Intelligence | ASD                | 0.20 (0.04)  | 5.43   | <0.001 | <0.001 |
| Intelligence | BD                 | -0.07 (0.02) | -3.15  | <0.001 | <0.001 |
| Intelligence | Insomnia           | -0.17 (0.03) | -6.37  | <0.001 | <0.001 |
| Intelligence | MDD                | -0.06 (0.02) | -2.72  | 0.006  | 0.017  |
| Intelligence | OCD                | 0.06 (0.05)  | 1.21   | 0.226  | 0.140  |
| Intelligence | Panic disorder     | -0.13 (0.05) | -2.52  | 0.012  | 0.141  |
| Intelligence | PTSD               | -0.19 (0.05) | -3.60  | <0.001 | 0.061  |
| Intelligence | Schizophrenia      | -0.25 (0.02) | -11.51 | <0.001 | <0.001 |
| Intelligence | Tourette syndrome  | -0.04 (0.04) | -0.91  | 0.361  | 0.350  |

ADHD: attention-deficit/hyperactivity disorder; ASD: autism spectrum disorder; BD: bipolar disorder; EA: educational attainment; MDD: major depressive disorder; OCD: obsessive-compulsive disorder; PTSD: posttraumatic stress disorder.

**Supplementary Table 3. Causal associations between educational attainment, intelligence, and income.**

| Exposure     | Outcome      | Method   | b (se)        | OR [95% CI]      | N_IV | Q_P    | I <sup>2</sup> | Egger_intercept | P_pleiotropy | P      |
|--------------|--------------|----------|---------------|------------------|------|--------|----------------|-----------------|--------------|--------|
| EA           | Income       | IVW      | 0.689 (0.015) | 1.99 [1.94-2.05] | 460  | <0.001 | 0.528          | NA              | NA           | <0.001 |
| EA           | Income       | WM       | 0.647 (0.018) | 1.91 [1.84-1.98] | 460  | NA     | NA             | NA              | NA           | <0.001 |
| EA           | Income       | MR-Egger | 0.761 (0.059) | 2.14 [1.91-2.40] | 460  | <0.001 | 0.526          | -0.001          | 0.209        | <0.001 |
| EA           | Intelligence | IVW      | 0.773 (0.022) | 2.17 [2.07-2.26] | 460  | <0.001 | 0.568          | NA              | NA           | <0.001 |
| EA           | Intelligence | WM       | 0.750 (0.025) | 2.12 [2.01-2.22] | 460  | NA     | NA             | NA              | NA           | <0.001 |
| EA           | Intelligence | MR-Egger | 0.797 (0.088) | 2.22 [1.87-2.64] | 460  | <0.001 | 0.568          | 0               | 0.773        | <0.001 |
| Intelligence | EA           | IVW      | 0.407 (0.026) | 1.50 [1.43-1.58] | 78   | <0.001 | 0.882          | NA              | NA           | <0.001 |
| Intelligence | EA           | WM       | 0.314 (0.019) | 1.37 [1.32-1.42] | 78   | NA     | NA             | NA              | NA           | <0.001 |
| Intelligence | EA           | MR-Egger | 0.461 (0.114) | 1.59 [1.27-1.98] | 78   | <0.001 | 0.881          | -0.001          | 0.624        | <0.001 |
| Intelligence | Income       | IVW      | 0.364 (0.027) | 1.44 [1.36-1.52] | 78   | <0.001 | 0.773          | NA              | NA           | <0.001 |
| Intelligence | Income       | WM       | 0.325 (0.024) | 1.38 [1.32-1.45] | 78   | NA     | NA             | NA              | NA           | <0.001 |
| Intelligence | Income       | MR-Egger | 0.520 (0.117) | 1.68 [1.34-2.12] | 78   | <0.001 | 0.767          | -0.004          | 0.173        | <0.001 |
| Income       | Intelligence | IVW      | 0.690 (0.040) | 1.99 [1.84-2.16] | 89   | <0.001 | 0.650          | NA              | NA           | <0.001 |
| Income       | Intelligence | WM       | 0.630 (0.039) | 1.88 [1.74-2.03] | 89   | NA     | NA             | NA              | NA           | <0.001 |
| Income       | Intelligence | MR-Egger | 0.637 (0.179) | 1.89 [1.33-2.69] | 89   | <0.001 | 0.650          | 0.001           | 0.763        | <0.001 |
| Income       | EA           | IVW      | 0.633 (0.027) | 1.88 [1.79-1.98] | 85   | <0.001 | 0.805          | NA              | NA           | <0.001 |
| Income       | EA           | WM       | 0.545 (0.027) | 1.72 [1.63-1.82] | 85   | NA     | NA             | NA              | NA           | <0.001 |
| Income       | EA           | MR-Egger | 0.889 (0.125) | 2.43 [1.90-3.11] | 85   | <0.001 | 0.795          | -0.005          | 0.039        | <0.001 |

EA: educational attainment; IVW: inverse variance weighted; WM: weighted median; OR: odds ratio; CI: confidence interval; N\_IV: number of instrumental variables; Q\_P: Cochran's P-value of heterogeneity analysis.

**Supplementary Table 4. Causal effects of the three factors on the mental disorders in the Multivariable MR analysis.**

| Exposure | Outcome            | Method   | b (se)         | OR [95% CI]      | N_IV | Q_P    | I <sup>2</sup> | Egger_intercept | P_pleiotropy | P      |
|----------|--------------------|----------|----------------|------------------|------|--------|----------------|-----------------|--------------|--------|
| EA       | ADHD               | IVW      | -0.333 (0.018) | 0.72 [0.69-0.74] | 457  | <0.001 | 0.517          | NA              |              | <0.001 |
| EA       | ADHD               | WM       | -0.300 (0.020) | 0.74 [0.71-0.77] | 457  | NA     | NA             | NA              |              | <0.001 |
| EA       | ADHD               | MR Egger | -0.249 (0.070) | 0.78 [0.68-0.89] | 457  | <0.001 | 0.515          | -0.001          | 0.217        | <0.001 |
| EA       | Alcohol dependence | IVW      | -0.286 (0.042) | 0.75 [0.69-0.82] | 460  | <0.001 | 0.238          | NA              |              | <0.001 |
| EA       | Alcohol dependence | WM       | -0.216 (0.060) | 0.81 [0.72-0.91] | 460  | NA     | NA             | NA              |              | <0.001 |
| EA       | Alcohol dependence | MR Egger | -0.069 (0.173) | 0.93 [0.66-1.31] | 460  | <0.001 | 0.236          | -0.003          | 0.197        | 0.689  |
| EA       | Anorexia nervosa   | IVW      | 0.364 (0.077)  | 1.44 [1.24-1.67] | 458  | <0.001 | 0.463          | NA              |              | <0.001 |
| EA       | Anorexia nervosa   | WM       | 0.418 (0.093)  | 1.52 [1.27-1.82] | 458  | NA     | NA             | NA              |              | <0.001 |
| EA       | Anorexia nervosa   | MR-Egger | 0.539 (0.311)  | 1.71 [0.93-3.16] | 458  | <0.001 | 0.463          | -0.002          | 0.561        | 0.084  |
| EA       | Anxiety disorder   | IVW      | -0.056 (0.020) | 0.95 [0.91-0.98] | 454  | 0.425  | 0.011          | NA              |              | 0.005  |
| EA       | Anxiety disorder   | WM       | -0.070 (0.030) | 0.93 [0.88-0.99] | 454  | NA     | NA             | NA              |              | 0.021  |
| EA       | Anxiety disorder   | MR Egger | -0.084 (0.085) | 0.92 [0.78-1.09] | 454  | 0.413  | 0.011          | 0               | 0.743        | 0.326  |
| EA       | ASD                | IVW      | 0.192 (0.036)  | 1.21 [1.13-1.30] | 460  | <0.001 | 0.464          | NA              |              | <0.001 |
| EA       | ASD                | WM       | 0.166 (0.043)  | 1.18 [1.08-1.29] | 460  | NA     | NA             | NA              |              | <0.001 |
| EA       | ASD                | MR Egger | 0.338 (0.145)  | 1.40 [1.06-1.86] | 460  | <0.001 | 0.463          | -0.002          | 0.297        | 0.020  |
| EA       | BD                 | IVW      | 0.323 (0.066)  | 1.38 [1.21-1.57] | 463  | <0.001 | 0.666          | NA              |              | <0.001 |
| EA       | BD                 | WM       | 0.300 (0.069)  | 1.35 [1.18-1.55] | 463  | NA     | NA             | NA              |              | <0.001 |
| EA       | BD                 | MR Egger | 0.538 (0.265)  | 1.71 [1.02-2.88] | 463  | <0.001 | 0.665          | -0.003          | 0.400        | 0.043  |
| EA       | Insomnia           | IVW      | -0.154 (0.013) | 0.86 [0.84-0.88] | 458  | <0.001 | 0.465          | NA              |              | <0.001 |
| EA       | Insomnia           | WM       | -0.154 (0.016) | 0.86 [0.83-0.88] | 458  | NA     | NA             | NA              |              | <0.001 |
| EA       | Insomnia           | MR Egger | -0.114 (0.050) | 0.89 [0.81-0.98] | 458  | <0.001 | 0.464          | -0.001          | 0.403        | 0.024  |
| EA       | MDD                | IVW      | -0.175 (0.028) | 0.84 [0.79-0.89] | 461  | <0.001 | 0.737          | NA              |              | <0.001 |
| EA       | MDD                | WM       | -0.179 (0.026) | 0.84 [0.79-0.88] | 461  | NA     | NA             | NA              |              | <0.001 |

|        |                    |          |                |                   |     |        |       |        |       |        |
|--------|--------------------|----------|----------------|-------------------|-----|--------|-------|--------|-------|--------|
| EA     | MDD                | MR Egger | -0.075 (0.111) | 0.93 [0.75-1.15]  | 461 | <0.001 | 0.737 | -0.001 | 0.355 | 0.498  |
| EA     | OCD                | IVW      | 0.253 (0.064)  | 1.29 [1.14-1.46]  | 461 | <0.001 | 0.248 | NA     |       | <0.001 |
| EA     | OCD                | WM       | 0.213 (0.083)  | 1.24 [1.05-1.46]  | 461 | NA     | NA    | NA     |       | 0.010  |
| EA     | OCD                | MR Egger | -0.096 (0.255) | 0.91 [0.55-1.50]  | 461 | <0.001 | 0.245 | 0.005  | 0.158 | 0.706  |
| EA     | Panic disorder     | IVW      | -0.390 (0.160) | 0.68 [0.49-0.93]  | 462 | 0.018  | 0.126 | NA     |       | 0.015  |
| EA     | Panic disorder     | WM       | -0.192 (0.238) | 0.83 [0.52-1.31]  | 462 | NA     | NA    | NA     |       | 0.419  |
| EA     | Panic disorder     | MR Egger | 0.358 (0.646)  | 1.43 [0.40-5.07]  | 462 | 0.018  | 0.123 | -0.010 | 0.233 | 0.580  |
| EA     | PTSD               | IVW      | -0.064 (0.015) | 0.94 [0.91-0.97]  | 462 | 0.004  | 0.155 | NA     |       | <0.001 |
| EA     | PTSD               | WM       | -0.071 (0.021) | 0.93 [0.89-0.97]  | 462 | NA     | NA    | NA     |       | <0.001 |
| EA     | PTSD               | MR Egger | -0.094 (0.059) | 0.91 [0.81-1.02]  | 462 | 0.004  | 0.155 | 0      | 0.595 | 0.113  |
| EA     | Schizophrenia      | IVW      | 0.050 (0.082)  | 1.05 [0.90-1.23]  | 461 | <0.001 | 0.812 | NA     |       | 0.536  |
| EA     | Schizophrenia      | WM       | -0.041 (0.066) | 0.96 [0.84-1.09]  | 461 | NA     | NA    | NA     |       | 0.532  |
| EA     | Schizophrenia      | MR Egger | 0.484 (0.327)  | 1.62 [0.85-3.08]  | 461 | <0.001 | 0.811 | -0.006 | 0.171 | 0.139  |
| EA     | TS                 | IVW      | -0.313 (0.056) | 0.73 [0.66-0.82]  | 460 | <0.001 | 0.275 | NA     |       | <0.001 |
| EA     | TS                 | WM       | -0.318 (0.078) | 0.73 [0.62-0.85]  | 460 | NA     | NA    | NA     |       | <0.001 |
| EA     | TS                 | MR Egger | -0.214 (0.224) | 0.81 [0.52-1.25]  | 460 | <0.001 | 0.275 | -0.001 | 0.650 | 0.340  |
| Income | ADHD               | IVW      | -0.280 (0.035) | 0.76 [0.70-0.81]  | 86  | <0.001 | 0.657 | NA     |       | <0.001 |
| Income | ADHD               | WM       | -0.229 (0.036) | 0.80 [0.74-0.85]  | 86  | NA     | NA    | NA     |       | <0.001 |
| Income | ADHD               | MR Egger | 0.012 (0.175)  | 1.01 [0.72-1.43]  | 86  | <0.001 | 0.645 | -0.005 | 0.091 | 0.944  |
| Income | Alcohol dependence | IVW      | -0.191 (0.085) | 0.83 [0.70-0.98]  | 88  | <0.001 | 0.488 | NA     |       | 0.024  |
| Income | Alcohol dependence | WM       | -0.101 (0.096) | 0.90 [0.75-1.09]  | 88  | NA     | NA    | NA     |       | 0.294  |
| Income | Alcohol dependence | MR Egger | -0.079 (0.397) | 0.92 [0.42-2.01]  | 88  | <0.001 | 0.488 | -0.002 | 0.774 | 0.842  |
| Income | Anorexia nervosa   | IVW      | 0.421 (0.119)  | 1.52 [1.21-1.92]  | 87  | <0.001 | 0.389 | NA     |       | <0.001 |
| Income | Anorexia nervosa   | WM       | 0.455 (0.148)  | 1.58 [1.18-2.11]  | 87  | NA     | NA    | NA     |       | 0.002  |
| Income | Anorexia nervosa   | MR-Egger | 1.514 (0.560)  | 4.55 [1.52-13.62] | 87  | <0.001 | 0.361 | -0.020 | 0.049 | 0.008  |

|        |                  |          |                |                  |    |        |        |        |       |        |
|--------|------------------|----------|----------------|------------------|----|--------|--------|--------|-------|--------|
| Income | Anxiety disorder | IVW      | -0.121 (0.033) | 0.89 [0.83-0.95] | 87 | 0.932  | -0.277 | NA     |       | <0.001 |
| Income | Anxiety disorder | WM       | -0.103 (0.047) | 0.90 [0.82-0.99] | 87 | NA     | NA     | NA     |       | 0.028  |
| Income | Anxiety disorder | MR Egger | 0.020 (0.162)  | 1.02 [0.74-1.40] | 87 | 0.931  | -0.292 | -0.003 | 0.375 | 0.901  |
| Income | ASD              | IVW      | -0.010 (0.068) | 0.99 [0.87-1.13] | 88 | <0.001 | 0.593  | NA     |       | 0.884  |
| Income | ASD              | WM       | 0.012 (0.074)  | 1.01 [0.87-1.17] | 88 | NA     | NA     | NA     |       | 0.876  |
| Income | ASD              | MR Egger | 0.504 (0.302)  | 1.66 [0.91-2.99] | 88 | <0.001 | 0.579  | -0.010 | 0.085 | 0.099  |
| Income | BD               | IVW      | -0.069 (0.130) | 0.93 [0.72-1.20] | 88 | <0.001 | 0.767  | NA     |       | 0.595  |
| Income | BD               | WM       | -0.004 (0.110) | 1.00 [0.80-1.24] | 88 | NA     | NA     | NA     |       | 0.973  |
| Income | BD               | MR Egger | 0.820 (0.585)  | 2.27 [0.72-7.15] | 88 | <0.001 | 0.761  | -0.017 | 0.123 | 0.165  |
| Income | Insomnia         | IVW      | -0.121 (0.022) | 0.89 [0.85-0.93] | 88 | <0.001 | 0.532  | NA     |       | <0.001 |
| Income | Insomnia         | WM       | -0.123 (0.025) | 0.88 [0.84-0.93] | 88 | NA     | NA     | NA     |       | <0.001 |
| Income | Insomnia         | MR Egger | -0.086 (0.099) | 0.92 [0.76-1.11] | 88 | <0.001 | 0.532  | -0.001 | 0.714 | 0.389  |
| Income | MDD              | IVW      | -0.302 (0.047) | 0.74 [0.67-0.81] | 86 | <0.001 | 0.745  | NA     |       | <0.001 |
| Income | MDD              | WM       | -0.228 (0.040) | 0.80 [0.74-0.86] | 86 | NA     | NA     | NA     |       | <0.001 |
| Income | MDD              | MR Egger | -0.199 (0.230) | 0.82 [0.52-1.29] | 86 | <0.001 | 0.744  | -0.002 | 0.649 | 0.389  |
| Income | OCD              | IVW      | 0.151 (0.102)  | 1.16 [0.95-1.42] | 87 | 0.066  | 0.192  | NA     |       | 0.139  |
| Income | OCD              | WM       | 0.216 (0.132)  | 1.24 [0.96-1.61] | 87 | NA     | NA     | NA     |       | 0.103  |
| Income | OCD              | MR Egger | 0.220 (0.466)  | 1.25 [0.50-3.11] | 87 | 0.058  | 0.192  | -0.001 | 0.880 | 0.638  |
| Income | Panic disorder   | IVW      | -0.885 (0.255) | 0.41 [0.25-0.68] | 87 | 0.293  | 0.072  | NA     |       | <0.001 |
| Income | Panic disorder   | WM       | -0.963 (0.357) | 0.38 [0.19-0.77] | 87 | NA     | NA     | NA     |       | 0.007  |
| Income | Panic disorder   | MR Egger | -1.613 (1.189) | 0.20 [0.02-2.05] | 87 | 0.278  | 0.067  | 0.014  | 0.532 | 0.179  |
| Income | PTSD             | IVW      | -0.116 (0.025) | 0.89 [0.85-0.93] | 89 | 0.077  | 0.182  | NA     |       | <0.001 |
| Income | PTSD             | WM       | -0.095 (0.034) | 0.91 [0.85-0.97] | 89 | NA     | NA     | NA     |       | 0.006  |
| Income | PTSD             | MR Egger | -0.065 (0.111) | 0.94 [0.75-1.16] | 89 | 0.069  | 0.179  | -0.001 | 0.637 | 0.559  |
| Income | Schizophrenia    | IVW      | -0.382 (0.156) | 0.68 [0.50-0.93] | 88 | <0.001 | 0.864  | NA     |       | 0.014  |



|              |                    |          |                |                   |    |        |        |        |       |        |
|--------------|--------------------|----------|----------------|-------------------|----|--------|--------|--------|-------|--------|
| Income       | Schizophrenia      | WM       | -0.266 (0.114) | 0.77 [0.61-0.96]  | 88 | NA     | NA     | NA     |       | 0.020  |
| Income       | Schizophrenia      | MR Egger | 1.014 (0.691)  | 2.76 [0.71-10.67] | 88 | <0.001 | 0.857  | -0.027 | 0.041 | 0.146  |
| Income       | TS                 | IVW      | -0.282 (0.111) | 0.75 [0.61-0.94]  | 87 | <0.001 | 0.489  | NA     |       | 0.011  |
| Income       | TS                 | WM       | -0.106 (0.129) | 0.90 [0.70-1.16]  | 87 | NA     | NA     | NA     |       | 0.411  |
| Income       | TS                 | MR Egger | 0.311 (0.501)  | 1.36 [0.51-3.65]  | 87 | <0.001 | 0.480  | -0.011 | 0.229 | 0.537  |
| Intelligence | ADHD               | IVW      | -0.158 (0.028) | 0.85 [0.81-0.90]  | 78 | <0.001 | 0.680  | NA     |       | <0.001 |
| Intelligence | ADHD               | WM       | -0.113 (0.026) | 0.89 [0.85-0.94]  | 78 | NA     | NA     | NA     |       | <0.001 |
| Intelligence | ADHD               | MR-Egger | -0.060 (0.124) | 0.94 [0.74-1.20]  | 78 | <0.001 | 0.677  | -0.002 | 0.422 | 0.632  |
| Intelligence | Alcohol dependence | IVW      | -0.115 (0.055) | 0.89 [0.80-0.99]  | 78 | 0.026  | 0.252  | NA     |       | 0.035  |
| Intelligence | Alcohol dependence | WM       | -0.125 (0.072) | 0.88 [0.77-1.02]  | 78 | NA     | NA     | NA     |       | 0.082  |
| Intelligence | Alcohol dependence | MR-Egger | -0.140 (0.252) | 0.87 [0.53-1.43]  | 78 | 0.022  | 0.251  | 0.001  | 0.919 | 0.581  |
| Intelligence | Anorexia nervosa   | IVW      | 0.160 (0.109)  | 1.17 [0.95-1.45]  | 77 | <0.001 | 0.570  | NA     |       | 0.143  |
| Intelligence | Anorexia nervosa   | WM       | 0.130 (0.122)  | 1.14 [0.90-1.44]  | 77 | NA     | NA     | NA     |       | 0.287  |
| Intelligence | Anorexia nervosa   | MR-Egger | 0.749 (0.512)  | 2.11 [0.77-5.77]  | 77 | <0.001 | 0.562  | -0.015 | 0.243 | 0.148  |
| Intelligence | Anxiety disorder   | IVW      | -0.005 (0.026) | 0.99 [0.95-1.05]  | 76 | 0.531  | -0.022 | NA     |       | 0.833  |
| Intelligence | Anxiety disorder   | WM       | -0.021 (0.036) | 0.98 [0.91-1.05]  | 76 | NA     | NA     | NA     |       | 0.555  |
| Intelligence | Anxiety disorder   | MR-Egger | -0.153 (0.148) | 0.86 [0.64-1.15]  | 76 | 0.532  | -0.036 | 0.004  | 0.316 | 0.306  |
| Intelligence | ASD                | IVW      | 0.144 (0.048)  | 1.15 [1.05-1.27]  | 78 | <0.001 | 0.502  | NA     |       | 0.003  |
| Intelligence | ASD                | WM       | 0.109 (0.055)  | 1.11 [1.00-1.24]  | 78 | NA     | NA     | NA     |       | 0.048  |
| Intelligence | ASD                | MR-Egger | -0.109 (0.208) | 0.90 [0.60-1.35]  | 78 | <0.001 | 0.492  | 0.006  | 0.216 | 0.601  |
| Intelligence | BD                 | IVW      | -0.032 (0.096) | 0.97 [0.80-1.17]  | 78 | <0.001 | 0.747  | NA     |       | 0.741  |
| Intelligence | BD                 | WM       | -0.129 (0.085) | 0.88 [0.74-1.04]  | 78 | NA     | NA     | NA     |       | 0.127  |
| Intelligence | BD                 | MR-Egger | -0.720 (0.431) | 0.49 [0.21-1.13]  | 78 | <0.001 | 0.738  | 0.017  | 0.106 | 0.099  |
| Intelligence | Insomnia           | IVW      | -0.068 (0.018) | 0.93 [0.90-0.97]  | 78 | <0.001 | 0.559  | NA     |       | <0.001 |
| Intelligence | Insomnia           | WM       | -0.062 (0.019) | 0.94 [0.91-0.98]  | 78 | NA     | NA     | NA     |       | 0.001  |

|              |                |          |                |                  |    |         |       |        |        |        |
|--------------|----------------|----------|----------------|------------------|----|---------|-------|--------|--------|--------|
| Intelligence | Insomnia       | MR-Egger | -0.144 (0.077) | 0.87 [0.75-1.01] | 78 | <0.001  | 0.552 | 0.002  | 0.309  | 0.063  |
| Intelligence | MDD            | IVW      | -0.005 (0.044) | 0.99 [0.91-1.09] | 78 | <0.001  | 0.833 | NA     |        | 0.909  |
| Intelligence | MDD            | WM       | -0.018 (0.033) | 0.98 [0.92-1.05] | 78 | NA      | NA    | NA     |        | 0.591  |
| Intelligence | MDD            | MR-Egger | -0.648 (0.186) | 0.52 [0.36-0.75] | 78 | <0.001  | 0.806 | 0.016  | <0.001 | <0.001 |
| Intelligence | OCD            | IVW      | -0.047 (0.084) | 0.95 [0.81-1.12] | 78 | 0.00753 | 0.303 | NA     |        | 0.575  |
| Intelligence | OCD            | WM       | -0.058 (0.107) | 0.94 [0.76-1.16] | 78 | NA      | NA    | NA     |        | 0.589  |
| Intelligence | OCD            | MR-Egger | -0.333 (0.368) | 0.72 [0.35-1.47] | 78 | 0.00718 | 0.297 | 0.007  | 0.427  | 0.368  |
| Intelligence | Panic disorder | IVW      | -0.046 (0.217) | 0.96 [0.62-1.46] | 78 | 0.034   | 0.238 | NA     |        | 0.834  |
| Intelligence | Panic disorder | WM       | -0.021 (0.286) | 0.98 [0.56-1.71] | 78 | NA      | NA    | NA     |        | 0.941  |
| Intelligence | Panic disorder | MR-Egger | -1.387 (1.003) | 0.25 [0.04-1.78] | 78 | 0.041   | 0.219 | 0.034  | 0.175  | 0.171  |
| Intelligence | PTSD           | IVW      | -0.011 (0.021) | 0.99 [0.95-1.03] | 78 | 0.041   | 0.229 | NA     |        | 0.579  |
| Intelligence | PTSD           | WM       | -0.008 (0.028) | 0.99 [0.94-1.05] | 78 | NA      | NA    | NA     |        | 0.778  |
| Intelligence | PTSD           | MR-Egger | -0.262 (0.085) | 0.77 [0.65-0.91] | 78 | 0.145   | 0.135 | 0.006  | 0.003  | 0.003  |
| Intelligence | Schizophrenia  | IVW      | -0.454 (0.135) | 0.63 [0.49-0.83] | 78 | <0.001  | 0.890 | NA     |        | <0.001 |
| Intelligence | Schizophrenia  | WM       | -0.553 (0.091) | 0.58 [0.48-0.69] | 78 | NA      | NA    | NA     |        | <0.001 |
| Intelligence | Schizophrenia  | MR-Egger | -1.640 (0.597) | 0.19 [0.06-0.63] | 78 | <0.001  | 0.884 | 0.03   | 0.045  | 0.008  |
| Intelligence | TS             | IVW      | -0.052 (0.081) | 0.95 [0.81-1.11] | 77 | <0.001  | 0.433 | NA     |        | 0.519  |
| Intelligence | TS             | WM       | 0.020 (0.096)  | 1.02 [0.85-1.23] | 77 | NA      | NA    | NA     |        | 0.836  |
| Intelligence | TS             | MR-Egger | 0.118 (0.355)  | 1.12 [0.56-2.25] | 77 | <0.001  | 0.431 | -0.004 | 0.624  | 0.741  |

EA: educational attainment; IVW: inverse variance weighted; WM: weighted median; OR: odds ratio; CI: confidence interval; N\_IV: number of instrumental variables; Q\_P: Cochran's P-value of heterogeneity analysis. ADHD: attention-deficit/hyperactivity disorder; ASD: autism spectrum disorder; BD: bipolar disorder; EA: educational attainment; MDD: major depressive disorder; OCD: obsessive-compulsive disorder; PTSD: posttraumatic stress disorder; TS: Tourette syndrome.
